# Supplementary material for: The Recombinant Oncolytic Virus VV-GMCSF-Lact and Chemotherapy Drugs against Human Glioma
Source: MDPI journal article supplement (doi:10.3390/ijms25084244), 2024-04-11
Supplement: s1 [file s1]

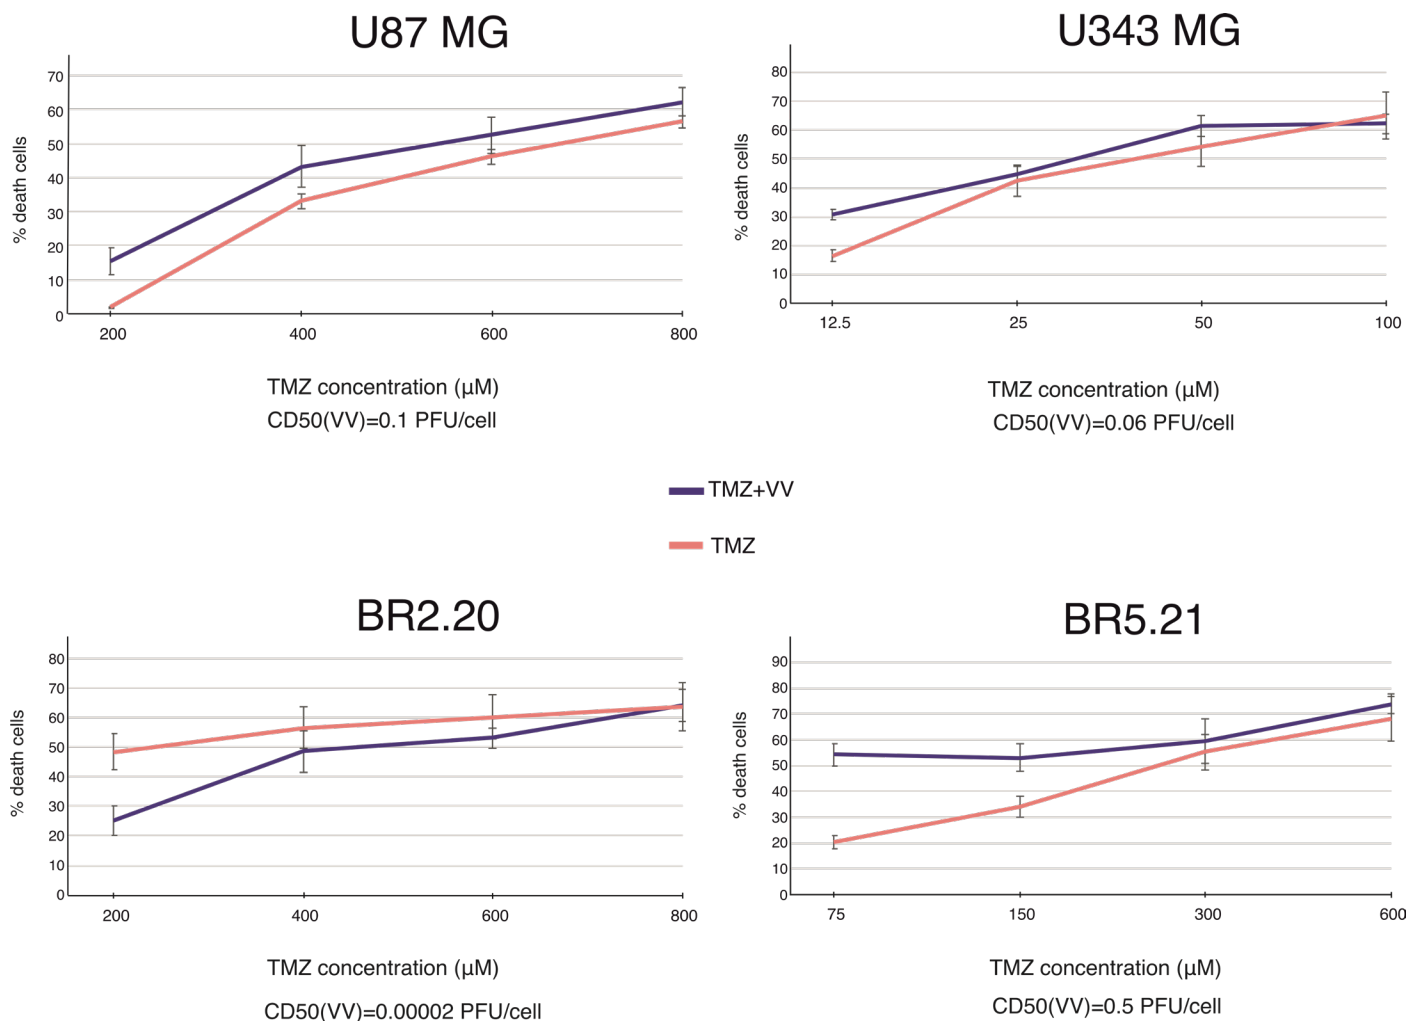

**Figure S1.** Changes in the viability of human glioma cells under the action of temozolomide followed by the addition of VV-GMCSF-Lact. VV-GMCSF-Lact was added to the cells after 24 h incubation with TMZ. CD50(VV)—multiplicity of virus infection, in which 50% of cells die; VV—VV-GMCSF-Lact; TMZ—temozolomide.
